# Supplementary material for: Autism-like syndrome is induced by pharmacological suppression of BET proteins in young mice
Source: PubMed Central journal article supplement — J Exp Med. 2015 Oct 19;212(11):1771–81. doi: 10.1084/jem.20151271 (PMC4612093; doi:10.1084/jem.20151271), 2015-10-19
Supplement: supp_jem.20151271_JEM_20151271_sm.pdf [file supp_jem.20151271_JEM_20151271_sm.pdf]

## SUPPLEMENTAL MATERIAL

Sullivan et al., <http://www.jem.org/cgi/content/full/jem.20151271/DC1>

A Table 1: Functional Comparison of I-BET Compounds

| Assay                                                                        | Target/Cell | GSK-1024858 (IC <sub>50</sub> nM) | GSK-525762 (IC <sub>50</sub> nM) | GSK-1210151 (IC <sub>50</sub> nM) |
|------------------------------------------------------------------------------|-------------|-----------------------------------|----------------------------------|-----------------------------------|
| Fluorescence Resonance Energy Transfer (FRET)                                | BRD4/BD1    | 27                                | 61                               | 30                                |
|                                                                              | BRD4/BD2    | 6                                 | 31                               | 339                               |
|                                                                              | BRD3/BD1    | 56                                | 71                               | 30                                |
|                                                                              | BRD3/BD2    | 21                                | 31                               | 83                                |
|                                                                              | BRD2/BD1    | 100                               | 117                              | 55                                |
|                                                                              | BRD2/BD2    | 17                                | 50                               | 209                               |
|                                                                              | BRDT/BD1    | 87                                | 57                               | 12                                |
|                                                                              | BRDT/BD2    | 23                                | 135                              | 1549                              |
| Surface Plasmon Resonance Affinity (BIAcore)                                 | BRD4        | 23 (Kd)                           | 230 (Kd)                         | 158 (Kd)                          |
| Inhibition of IL-6 Production from Lipopolysaccharide (LPS) Stimulated Cells | Human PBMC  | 3                                 | 316                              | 200                               |
|                                                                              | Human Blood | 200                               | 398                              | 794                               |
|                                                                              | Rat Blood   | 50                                | 316                              | 200                               |

B Table 2: Pharmacokinetic parameters of I-BET858 compounds

| PK Parameter        | Mouse IP n=3 | Rat IV n=3          | Rat PO n=3 |
|---------------------|--------------|---------------------|------------|
| Dose (mg/kg)        | 30 (3)       | 1 (1h infusion)     | 5          |
| CLb (ml/min/kg)     | -            | 26                  | -          |
| Vss (L/kg)          | -            | 13.4                | -          |
| Cmax (ng/ml)        | 2001 (166)   | 116                 | 133        |
| Tmax (h)            | 0.5-4.0      | -                   | 2.0        |
| T <sub>1/2</sub>    | -, (4.2)     | 6.8                 | 9.8        |
| %Fpo                | -            | -                   | 47         |
| Brain:Blood         | 0.63 (4h)    | 0.85 (steady state) | -          |
| F <sub>ub</sub> (%) | 2.6          | 3.6                 | -          |

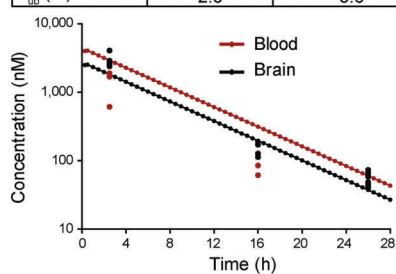

C

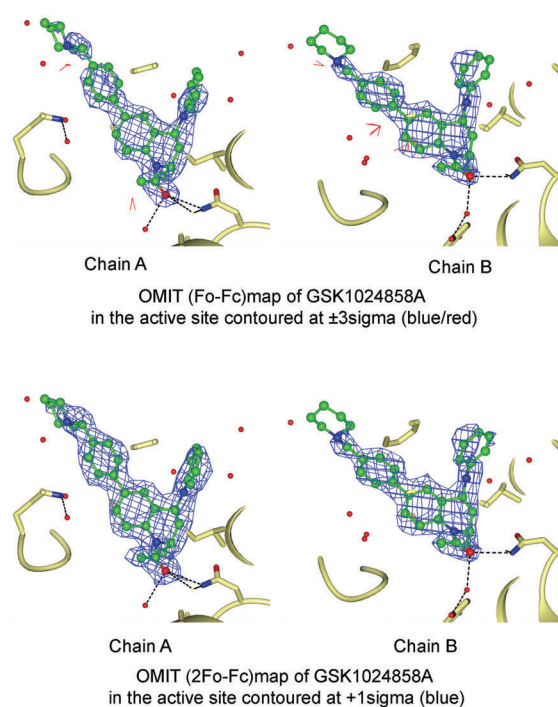

D Table 3: Crystallography data collection &amp; refinement statistics

| (collection on a single crystal) BRD4-BD1 ligand complex |                                               |
|----------------------------------------------------------|-----------------------------------------------|
| Data collection                                          |                                               |
| Space group                                              | P2 <sub>1</sub> 2 <sub>1</sub> 2 <sub>1</sub> |
| Cell dimensions                                          |                                               |
| <i>a</i> , <i>b</i> , <i>c</i> (Å)                       | 42.149, 59.497, 108.025                       |
| $\alpha$ , $\beta$ , $\gamma$ (°)                        | 90.000, 90.000, 90.000                        |
| Resolution (Å)                                           | 36.01-2.01 (2.13-2.01)                        |
| <i>R</i> <sub>merge</sub>                                | 0.082 (0.352)                                 |
| <i>I</i> / $\sigma$ <i>I</i>                             | 8.1 (2.7)                                     |
| Completeness (%)                                         | 97.0 (98.2)                                   |
| Redundancy                                               | 2.7 (2.8)                                     |
| Refinement                                               |                                               |
| Resolution (Å)                                           | 36.01-2.01                                    |
| No. reflections                                          | 49497 (8136)                                  |
| No. uniq reflections                                     | 18016 (2893)                                  |
| <i>R</i> <sub>work</sub> / <i>R</i> <sub>free</sub>      | 0.214/0.271                                   |
| No. atoms                                                |                                               |
| Protein                                                  | 2518                                          |
| Ligand/ion                                               | 68/12                                         |
| Water                                                    | 307                                           |
| B-factors                                                |                                               |
| Protein                                                  | 29.16                                         |
| Ligand/ion                                               | 25.99/43.47                                   |
| Water                                                    | 39.93                                         |
| R.m.s deviations                                         |                                               |
| Bond lengths (Å)                                         | 0.007                                         |
| Bond angles (°)                                          | 1.174                                         |

\*Highest resolution shell is shown in parenthesis

**Figure S1. Identification and characterization of a novel brain-permeable inhibitor of BET proteins (I-BET858).** (A) Acetyl lysine ligand displacement, direct Biacore binding and functional BET inhibitory activity in human blood by I-BET858 and related I-BET151 and I-BET762 compounds was measured using standard protocols (Nicodeme et al., 2010; Dawson et al., 2011). (B) Pharmacokinetic parameters of in vivo I-BET858 treatment were determined for mouse and rat brain tissue and blood as referenced in Methods section. Graph shows mouse brain (black) and blood (red) I-BET858 concentrations in nM at 2, 16, and 26 h after a single i.p. injection of 30 mg/kg (*n* = 4–10 mice/time point). (C) OMIT maps of different electron density at the acetylated-lysine site are shown. (D) X-ray crystallography of the BRD4-BD1 complex with I-BET858 was performed as described previously (Nicodeme et al., 2010).

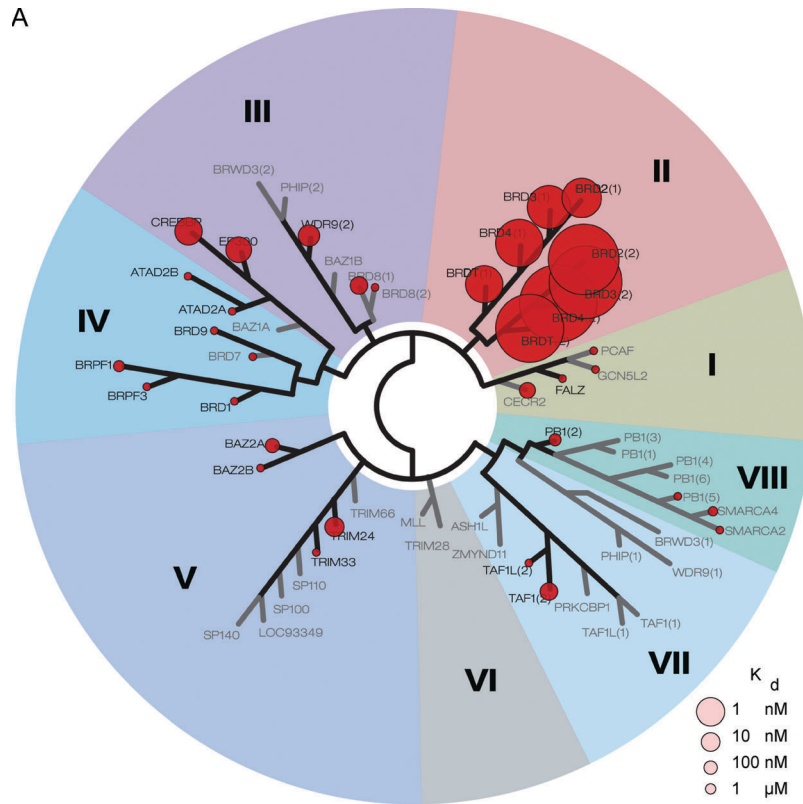

B Table 4: Bromodomain Selectivity of I-BET858

| Target Gene Symbol | I-BET858 Kd nM | Target Gene Symbol  | I-BET858 Kd nM |
|--------------------|----------------|---------------------|----------------|
| BRD2(1)            | 23             | BRPF1               | 20000          |
| BRD2(2)            | 0.47           | BRPF3               | >30000         |
| BRD3(1)            | 10             | CECR2               | 9500           |
| BRD3(2)            | 0.39           | CREBBP              | 270            |
| BRD4(1)            | 6.4            | EP300               | 410            |
| BRD4(2)            | 0.25           | FALZ                | >30000         |
| BRDT(1)            | 35             | GCN5L2              | >30000         |
| BRDT(2)            | 0.59           | PBRM1(2)            | 17000          |
| ATAD2A             | >30000         | PBRM1(5)            | >30000         |
| ATAD2B             | >30000         | PCAF                | >30000         |
| BAZ2A              | 12000          | SMARCA2             | >30000         |
| BAZ2B              | >30000         | SMARCA4             | 24000          |
| BRD1               | >30000         | TAF1(2)             | 5000           |
| BRD7               | >30000         | TAF1L(2)            | >30000         |
| BRD8(1)            | 4900           | TRIM24 (PHD Bromo.) | 2700           |
| BRD8(2)            | >30000         | TRIM33 (PHD Bromo.) | >30000         |
| BRD9               | >30000         | WDR9(2)             | 1200           |

**Figure S2. Affinity analysis of I-BET858 for bromodomain-containing proteins.** (A) I-BET858 binding affinities across 34 bromodomain-containing proteins, including the BET subfamily with  $K_d > 1 \mu\text{M}$  are indicated by pink circles. (B) I-BET858 affinities across 34 bromodomain-containing proteins are shown using BROMOscan Bromodomain Profiling (Theodoulou et al., 2015). I-BET858 shows highest affinity for the BET subfamily with >1,000 fold selectivity.

Table S1 (available as an Excel file) contains the effects of I-BET858 treatment on gene expression in primary neurons in vitro (2 and 12 h). Table S2 (available as an Excel file) lists the effects of I-BET858 on BDNF-inducible gene expression in primary neurons in vitro (2 and 12 h). Table S3 (available as an Excel file) displays the effects of acute and chronic I-BET858 on striatal gene expression in vivo. Table S4 (available as an Excel file) shows the gene lengths analysis of I-BET858 suppressed genes in vitro and in vivo.

#### SUPPLEMENTAL REFERENCES

- Dawson, M.A., R.K. Prinjha, A. Dittmann, G. Giotopoulos, M. Bantscheff, W.I. Chan, S.C. Robson, C.W. Chung, C. Hopf, M.M. Savitski, et al. 2011. Inhibition of BET recruitment to chromatin as an effective treatment for MLL-fusion leukaemia. *Nature*. 478:529–533. <http://dx.doi.org/10.1038/nature10509>
- Nicodeme, E., K.L. Jeffrey, U. Schaefer, S. Beinke, S. Dewell, C.W. Chung, R. Chandwani, I. Marazzi, P. Wilson, H. Coste, et al. 2010. Suppression of inflammation by a synthetic histone mimic. *Nature*. 468:1119–1123. <http://dx.doi.org/10.1038/nature09589>
- Theodoulou, N.H., P. Bamborough, A.J. Bannister, I. Becher, R.A. Bit, K.H. Che, C.W. Chung, A. Dittmann, G. Drewes, D.H. Drewry, et al. 2015. Discovery of I-BRD9, a selective cell active chemical probe for bromodomain containing protein 9 inhibition. *J. Med. Chem.* <http://dx.doi.org/10.1021/acs.jmedchem.5b00256>.
